# Supplementary material for: Brief communication: Accurate and autonomous snow water equivalent measurements using a cosmic ray sensor on a Himalayan glacier
Source: Copernicus journal article supplement (doi:10.5194/tc-18-5913-2024), 2024-12-17
Supplement: Supplementary file 1 [file tc-18-5913-2024-supplement.pdf]

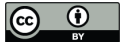

*Supplement of*

**Brief communication: Accurate and autonomous snow water equivalent measurements using a cosmic ray sensor on a Himalayan glacier**

**Navaraj Pokhrel et al.**

*Correspondence to:* Navaraj Pokhrel (navaraj.77558@cdhm.tu.edu.np)

The copyright of individual parts of the supplement might differ from the article licence.

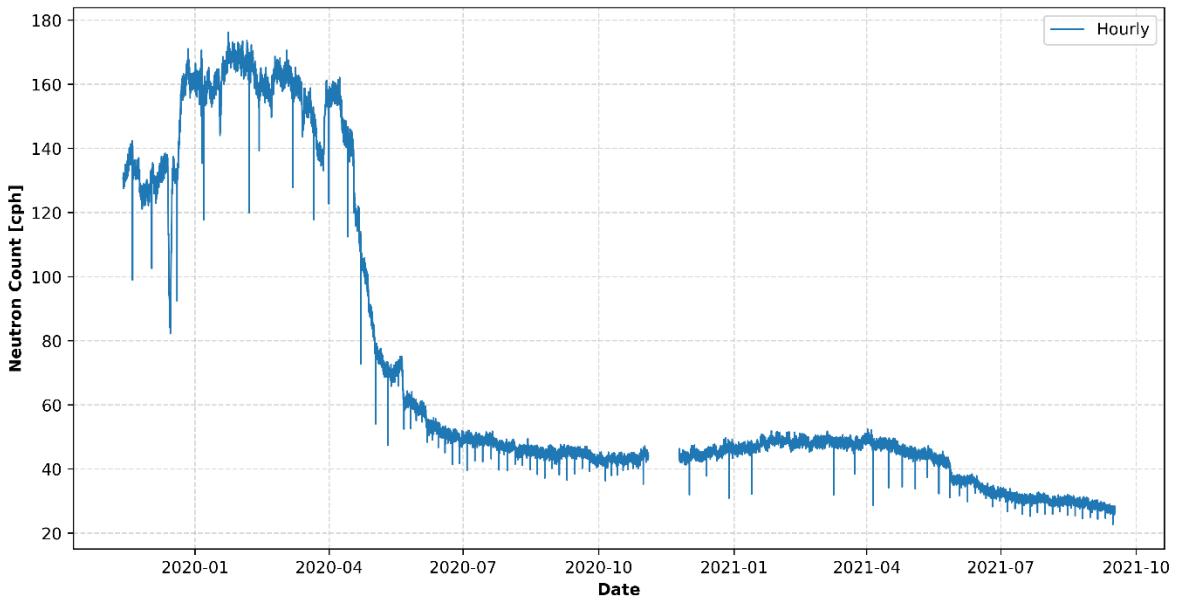

Figure S1: Evolution of absolute neutron count over time.

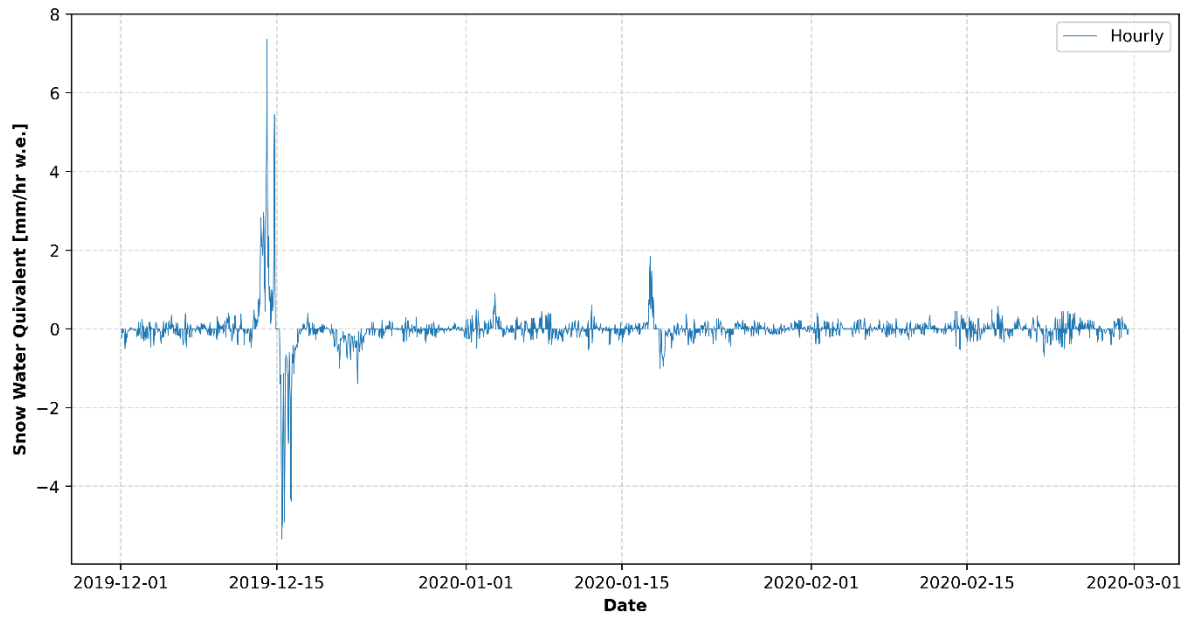

Figure S2: Change in SWE over time.

| <b><i>Station</i></b>                                                                | <b><i>Variables (gap % during the study period)</i></b> | <b><i>Sensor (uncertainty)</i></b>                     |
|--------------------------------------------------------------------------------------|---------------------------------------------------------|--------------------------------------------------------|
| <b><i>Khare Geonor,<br/>4888 m a.s.l.<br/>Off-glacier, on<br/>grassy surface</i></b> | P (0)                                                   | GEONOR T-200BM ( $\pm 15\%$ )                          |
| <b><i>AWS-H<br/>5770 m a.s.l.<br/>On-glacier<br/>(accumulation<br/>area)</i></b>     | SWE (11)                                                | SnowFox                                                |
|                                                                                      | T (23), RH (23)                                         | Vaisala-HMP45C ( $\pm 0.2^\circ\text{C}$ ; $\pm 2\%$ ) |
|                                                                                      | u (23)                                                  | Young 05103-5 ( $\pm 0.3$ m/s)                         |
|                                                                                      | SWin (23), SWout (23),<br>LWin (23), LWout (71)         | Kipp & Zonen CNR4 ( $\pm 3\%$ )                        |
| <b><i>AWS-L, 5360 m<br/>a.s.l.<br/>On-glacier<br/>(ablation area)</i></b>            | T (23), RH (23)                                         | Vaisala-HMP45C ( $\pm 0.2^\circ\text{C}$ ; $\pm 2\%$ ) |
|                                                                                      | u (25.8)                                                | Young 05103-5 ( $\pm 0.3$ m/s)                         |
| <b><i>AWS Mera-La,<br/>5352 m a.s.l.<br/>On firm rocks<br/>(off-glacier)</i></b>     | P <sub>a</sub> (0)                                      | CS100 ( $\pm 2.0$ hPa)                                 |

Table S1: Station details, including meteorological parameters, data gaps, sensor types, and uncertainties.
